# Supplementary material
Source: ML conference proceedings conference paper supplement (https://openreview.net/forum?id=IUikebJ1Bf0)
Supplement: supplementary_material [file attachment]

---

# Thor: Wielding Hammers to Integrate Language Models and Automated Theorem Provers

---

Anonymous Author(s)

Affiliation

Address

email

## Abstract

In theorem proving, the task of selecting useful premises from a large library to unlock the proof of a given conjecture is crucially important. This presents a challenge for all theorem provers, especially the ones based on language models, due to their relative inability to reason over huge volumes of premises in text form. This paper introduces Thor, a framework integrating language models and automated theorem provers to overcome this difficulty. In Thor, a class of methods called hammers that leverage the power of automated theorem provers are used for premise selection, while all other tasks are designated to language models. Thor increases a language model’s success rate on the PISA dataset from 39% to 57%, while solving 8.2% of problems neither language models nor automated theorem provers are able to solve on their own. Furthermore, with a significantly smaller computational budget, Thor can achieve a success rate on the MiniF2F dataset that is on par with the best existing methods. Thor can be instantiated for the majority of popular interactive theorem provers via a straightforward protocol we provide.

## 1 Introduction

In theorem proving, premise selection is the task of identifying useful facts from a large library that enable finding the proof of a given conjecture. It is essential for the discovery of many proofs, and Automated Reasoning in Large Theories (ARLT) depends on having apt methods for premise selection [Kühlwein et al., 2012, Sutcliffe et al., 2007]. A group of proof methods have been developed inside interactive theorem provers (ITPs) to deal with this task. They use external automated theorem provers (ATPs) to reach the remaining goals, inspect the proofs produced, and pick out the premises involved in them. Such systems are called hammers [Blanchette et al., 2016]. Hammers are available in many ITPs [Paulson, 2010, Kaliszyk and Urban, 2015, Gauthier and Kaliszyk, 2015, Czajka and Kaliszyk, 2018] and are immensely popular within the theorem proving community.

Language models have had some successful applications in the area of formal theorem proving [Polu and Sutskever, 2020, Han et al., 2021, Jiang et al., 2021, Polu et al., 2022]. However, we observe that language-model-based reasoning systems are inept at premise selection. The difficulty of premise selection for language models is that they cannot effectively reason over thousands of available facts and their definitions in plain text form. In subsection 2.2, we elaborate on the scale of the problems language models need to deal with for premise selection and provide empirical evidence for this difficulty. Seeing that hammers are very good at finding relevant facts, we propose in our framework to offload the premise selection task to them from language models. The resulting system is Thor, a framework that organically integrates language models and ATPs via the use of hammers.

The methodology of Thor is simple and can be deployed in any hammer-enabled ITP: we first use the hammer method to attempt to prove every proof state in the training problems, and mark the successful application steps. Then we train the language model on the training problems, predicting a

37 special token (e.g., `<hammer>`) if the hammer can be applied at the state. When doing evaluation, if  
 38 the language model emits the special token, we invoke the hammer method. This methodology incurs  
 39 very little extra computation compared to standard language model training while capitalising on the  
 40 potential of a hybrid neuro-symbolic model.

41 To demonstrate the usefulness of Thor, we instantiate it with a language-model-based reasoning  
 42 system for the ITP Isabelle and Sledgehammer [Paulson, 2010], Isabelle’s implementation of the  
 43 hammer method. We then investigate the performance of the instantiated Thor system on two datasets,  
 44 PISA [Jiang et al., 2021] and MiniF2F [Zheng et al., 2022]. On PISA we dramatically improve the  
 45 success rate of a language-model-based reasoning system from 39.0% to 57.0% and solve 8.2% of  
 46 problems that cannot be solved by either language models or Sledgehammer alone. On MiniF2F, Polu  
 47 et al. [2022] used expert iteration to improve on a language model and achieved the state-of-the-art  
 48 1-pass success rate of 29.6%. With much less computation, Thor increases this rate to 29.9%, slightly  
 49 exceeding the previous result. It is worth noting that Thor and expert iteration can be used in tandem.

50 In this paper, we demonstrate that finding suitable sub-systems for premise selection can benefit  
 51 the performance of the overall reasoning system. Given Thor’s strong performance, computational  
 52 efficiency, and applicability to many ITPs, we believe it should become a strong baseline as often as  
 53 possible when language models are used for theorem proving.

## 54 Contributions

- 55 1. We created Thor, a theorem proving framework which integrates language models and  
 56 automated theorem provers via using hammers.
- 57 2. We raised the state-of-the-art success rate of language-model-based reasoning systems on  
 58 PISA from 39.0% to 57.0%. Thor proved 8.2% theorems which cannot be proved by either  
 59 language models or Sledgehammer.
- 60 3. We improved the state-of-the-art success rate on MiniF2F from 29.6% to 29.9%, matching  
 61 the language models trained with expert iteration, but with far less computation.

## 62 2 Background

### 63 2.1 Automated and Interactive Theorem Proving

64 Mechanising theorem proving has been a grand challenge of artificial intelligence since the late  
 65 1950s [Gelernter, 1959]. A group of systems which we call automated theorem provers attempt to  
 66 use automated procedures to determine the validity of conjectures (e.g., the DPLL algorithm [Davis  
 67 et al., 1962] for SAT problems [Tarski, 1969]). Popular examples of ATPs include E, SPASS, Z3,  
 68 CVC4, and Vampire. Although SAT is known to be NP-complete [Cook, 1971], modern ATPs can  
 69 often solve problems with millions of symbols [Ohrimenko et al., 2009] and are useful practically.

70 ATPs are often based on fragments of first-order logic, which limits the type of theorems they can  
 71 express. Hence, projects such as the formalisation of complicated mathematical results [Gonthier  
 72 et al., 2008, Avigad et al., 2007, Gonthier et al., 2013, Scholze, 2021] and operating system kernel  
 73 verification [Klein et al., 2009] are done in interactive theorem provers, often based on higher-order  
 74 logic or dependent type theory. ITPs and ATPs have very different objectives: ITPs aim at making it  
 75 easy to formalise a diverse set of problems in numerous mathematical domains in a sound manner;  
 76 while ATPs focus on improving the efficiency and performance on very well-defined problems like  
 77 SAT solving. Prominent ITPs include Isabelle, Mizar, HOL Light, HOL4, Lean, and Coq. Theorem  
 78 proving in ITPs can be modelled as a sequential decision process: initially a theorem gets declared  
 79 and the `proof state` contains some goals; at each step, the user produces a `proof step` that  
 80 applies to and transforms the `proof state`; when all the goals have been discharged, the theorem is  
 81 considered proven. Large libraries of mathematical knowledge such as the Archive of Formal Proofs<sup>1</sup>  
 82 and the Mizar Mathematical Library<sup>2</sup> have been built around these ITPs. Because of the size of these  
 83 mathematical libraries, to find useful premises in them is a difficult problem. In the next subsections  
 84 we illustrate how two different approaches deal with premise selection.

---

<sup>1</sup><https://www.isa-afp.org>

<sup>2</sup><http://mizar.org/library/>

```

lemma "sqrt 2 ∉ ℚ"
proof
  assume "sqrt 2 ∈ ℚ"
  then obtain a b::int where "sqrt 2 = a/b"
    "coprime a b" "b ≠ 0" sledgehammer
  then have c: "2 = a^2 / b^2"
    sledgehammer
  then have "b^2 ≠ 0" sledgehammer
  then have *: "2*b^2 = a^2"
    sledgehammer
  then have "even a"
    sledgehammer
  then obtain c::int where "a=2*c"
    sledgehammer
  with * have "b^2 = 2*c^2"
    sledgehammer
  then have "even b"
    sledgehammer
  with (coprime a b) (even a) (even b)
    show False sledgehammer
qed

```

(a) The proof sketch produced by the human user. The `sledgehammer` command indicates that the human invokes the Sledgehammer method at that point.

```

lemma "sqrt 2 ∉ ℚ"
proof
  assume "sqrt 2 ∈ ℚ"
  then obtain a b::int where "sqrt 2 = a/b" "coprime a b" "b ≠ 0"
    by (metis Rats_cases' less_irrefl)
  then have c: "2 = a^2 / b^2"
    by (smt (z3) of_int_power power_divide real_sqrt_pow2)
  then have "b^2 ≠ 0" by fastforce
  then have *: "2*b^2 = a^2"
    by (smt (verit, ccfv_SIG) c comm_semiring_class.distrib
      eq_divide_eq_numeral(1) mult_cancel_right1 numeral_Bit0
      numeral_plus_numeral of_int_add of_int_power
      of_int_power_eq_of_int_cancel_iff one_plus_numeral)
  then have "even a"
    by (smt (z3) even_power oddE)
  then obtain c::int where "a=2*c" by blast
  with * have "b^2 = 2*c^2" by auto
  then have "even b"
    by (smt (z3) even_power oddE)
  with (coprime a b) (even a) (even b) show False by fastforce
qed

```

(b) The proof accepted by Isabelle. The steps containing `assume`, `obtain`, `have`, `show` are from the original human proof sketch. The steps containing `metis`, `smt`, `fastforce`, `blast`, `auto`, `fastforce` are completed by Sledgehammer.

Figure 1: A proof of  $\sqrt{2} \notin \mathbb{Q}$ , adapted from the original by Li et al. [2021] with consent.

## 2.2 Language Models for Theorem Proving

Language models that automate theorem proving mostly follow the approach of the *GPT-f* model [Polu and Sutskever, 2020]: pre-trained causal language models are used to predict a proof step that can be applied, given the current proof state and some optional context. Concretely, a language model can take as input and output, two sequences of the following form:

INPUT: <SOS> <CTXT> \$(context) <PRF\_STT> \$(proof state) <PRF\_STP>  
 OUTPUT: \$(proof step) <EOS>

At test time, the reasoning system receives the text representation of the current proof state, samples a proof step from the language model, applies it to the ITP, and repeats until the proof is finished or a computational budget has been reached. A best-first strategy is often used for proof search: a queue of search nodes is maintained with the priority being the accumulated log likelihood of the generated proof steps.

Language models treat all input and output information as text and they are usually limited to be a few thousands of characters long. To do premise selection well, the language model has to either memorise all the relevant premises during training, or be prompted with available premises in evaluation. It is difficult to do the former because a mathematical corpus can have too many facts for a language model to remember. For example, the Archive of Formal Proofs has more than 200,000 theorems, plus the numerous definitions and their derivations to serve as premises. The latter is no easier because there may be too many premises to fit into the input. For instance, if we use the textual representation of 300 available premises (a usual number used for premise selection with symbolic tools) and their definitions as the `context` in the input-output format above, the input length can well exceed 10,000 characters and the limit of standard language models. We observe that empirically 1.9% of the steps involving premise selection generated by the language model manage to advance the proof, while the number is 28.2% for steps having no premises. Hence, a good mechanism for premise selection could bring crucial benefits.

## 2.3 Hammers

Blanchette et al. [2016] define hammers as methods that “automate reasoning over large libraries developed with formal proof assistants (ITPs)”. Consider, for example, Sledgehammer (designed for Isabelle) which is the original and the most popular implementation of hammers. Figure 1 presents a proof of  $\sqrt{2} \notin \mathbb{Q}$  in Isabelle. The beauty of using Sledgehammer with Isabelle is that despite the complicated-looking proof, humans only need to sketch the proof in Figure 1a and let Sledgehammer find all the necessary premises to complete every single proof step. The final accepted proof is presented in Figure 1b. The Sledgehammer proof steps use the internal proof methods

metis, meson, smt, auto, simp, fastforce and blast. Conveniently, this tells us which steps in the corpus are generated by Sledgehammer. Note that a human user might also use the proof methods auto, simp, fastforce and blast as these do not contain additional premises. Only the methods metis, meson, smt are exclusive to Sledgehammer.

We now describe how Sledgehammer performs premise selection: Sledgehammer makes it possible to leverage the advancement of ATP research while using ITPs, and can thus be seen as a bridge between the two [Paulson, 2010]. When invoked, Sledgehammer translates the current goal together with hundreds of possibly relevant premises into a format (e.g., SMT-LIB, TPTP) that external ATPs can understand [Meng and Paulson, 2008]. The ATPs are then executed to solve the current goal. Note that Isabelle follows a kernel philosophy (i.e., only a handful of axioms and inference rules are trusted), and external ATPs are used skeptically—should a proof be found by the ATPs, Sledgehammer picks out the useful premises, and reconstructs the proof within the Isabelle kernel (e.g., using the primitive inference rules). Here, external ATPs serve as relevance filters of premises rather than trusted oracles. Hammers implemented in other ITPs are largely similar.

### 3 Thor

In this section we introduce Thor, a framework integrating language models and automated theorem provers via the use of hammers. Thor is motivated by the difficulty for language models to do premise selection and the excellent performance of hammers for it: we should be able to drastically improve automation in theorem proving if we can take the best from both worlds.

Below we provide the protocol of adopting Thor for a hammer-enabled ITP. We first provide Thor’s training data preprocessing procedure in Algorithm 1, and then look at a concrete example to demonstrate its use.

---

**Algorithm 1** Thor’s training data preprocessing algorithm.

---

**Require:** Proof state  $s$ , hammer method  $h$   
  INPUT =  $s$ .input  
  **if**  $h(s) \rightarrow \text{success}$  **then** ▷ Hammer can be applied to the proof state  
    OUTPUT =  $\langle \text{hammer} \rangle \langle \text{EOS} \rangle$   
  **else** ▷ Hammer fails at the proof state  
    OUTPUT =  $s$ .output  
  **end if**  
  **return** (INPUT, OUTPUT)

---

Now consider the situation in the proof of  $\sqrt{2} \notin \mathbb{Q}$  (Figure 1) after the step **then have "even a"**: without Thor, it should produce the following datapoint

INPUT:   <SOS> <CTXT> \$(context) <PRF\_STT> \$(proof state) <PRF\_STP>  
OUTPUT:   by (smt (z3) even\_power oddE) <EOS>

With Thor’s preprocessing, we apply the hammer method to the proof state and find out that it can be done successfully. Hence, we keep the input the same and change the output to:

OUTPUT:   <hammer> <EOS>

If the hammer method cannot be applied, we leave the datapoint unchanged. We iterate over every datapoint in the training data and apply this preprocessing algorithm.

We hypothesise that being exposed to training data in this format, the language model is capable of learning a heuristic for *when* the hammer can be successfully invoked. At evaluation time, whenever the language model outputs the sequence  $\langle \text{hammer} \rangle \langle \text{EOS} \rangle$ , instead of applying it directly to the ITP, we call the hammer method. This effectively makes the hammer an invocable method for the language model. This protocol is straightforward to implement for hammer-enabled ITPs.

The only extra cost of deploying Thor is in the data preprocessing step. Multiplying the hammer time limit by the average number of problems submitted to the Archive of Formal Proofs in one year, we estimate that 7400 CPU hours per year are needed to preprocess one of the largest proof corpora

available. This is a modest cost since the process only needs to be done once per dataset and the results can be shared. Better still, for some ITPs, the hammer method leaves a trace, greatly reducing the time needed to figure out which steps can be solved by hammers. For the ITP Coq, all steps containing the keyword `sauto` are generated by CoqHammer [Czajka and Kaliszyk, 2018]. For Isabelle, all steps containing the keywords `metis`, `meson`, `smt` are generated by Sledgehammer (described in Section 2.3). With these traces, deploying Thor on ITPs like Coq or Isabelle incurs little extra computational cost compared to training a standard language model.

## 4 Experiment

Our experiments are intended to answer the following research questions:

1. Can Thor prove theorems that cannot be proved by language models or automated theorem provers individually? Does Thor improve premise selection for language models?
2. Does explicitly learning *how* to select premises hurt the performance of language models?
3. How important are the context information and the diversity of sequence generation?
4. How does Thor compare with other methods at improving language models for theorem proving?

To answer these questions, we create an instance of Thor for the ITP Isabelle. We choose Isabelle for two reasons: (1) Isabelle’s Sledgehammer is one of the most mature hammer methods among major ITPs, and may thus showcase Thor’s full potential; and (2) Isabelle’s Archive of Formal Proofs is one of the world’s largest formal mathematical libraries, suitable for data-hungry methods like language models. We make explicit the details of our experimental setup next.

### 4.1 Experimental Setup

**Machine specification** For pre-training, fine-tuning, and evaluation, we use a TPUVM with 8 cores from Google Cloud Platform. The Isabelle process has access to up to 32 CPU cores. We estimate that reproducing all the experiments in this paper requires a total of 1160 TPU hours.

**Language model architecture** We use a decoder-only transformer [Vaswani et al., 2017] language model, adapting the setup, codebase, and hyperparameters from [Wang and Komatsuzaki, 2021]. The language model has 700M non-embedding parameters, with 24 layers, 24 attention heads, a hidden dimension of 1536, and a GPT-2 [Radford et al., 2019] tokenizer with a vocabulary size of 50400. Rotary positional embeddings [Su et al., 2021] are used. The model is pre-trained on the GitHub + arXiv subsets of The Pile [Gao et al., 2021], with a context length of 2048. We use a global batch size of 32 sequences which amounts to 65536 tokens. For the first 3,000 steps, the learning rate linearly increases from 0 to 0.0002, and then it follows a cosine schedule with a final value of  $1.2 \times 10^{-5}$  for 197,000 steps. We use a weight decay rate of 0.05 and no dropout for pre-training. Pre-training takes  $\approx 150$  TPU hours. For fine-tuning, we use the procedure described in Section 3 to prepare the PISA dataset. We use the most recent proof step as the context in each datapoint. The same learning rate scheduling strategy is used, with a peak learning rate of  $3 \times 10^{-4}$  after 10,000 steps and a final learning rate of  $3 \times 10^{-5}$  after a further 90,000 steps. We use a dropout rate of 0.15 and a weight decay rate of 0.1. The global batch size is 256 sequences, or 524,288 tokens. We early-stop fine-tuning and take the checkpoint at 11,000 steps for evaluation as the validation loss reaches a minimum then. Fine-tuning takes  $\approx 50$  TPU hours.

**Sledgehammer configuration** To set up Sledgehammer, we mostly follow the default Isabelle2021 configuration. An important default parameter is that the Sledgehammer timeout limit is 30s. Our configuration uses the on-machine versions of the five default ATPs (E, SPASS, Vampire, Z3, and CVC4) to prevent performance deviation caused by network issues.

**Proof search** To sample from the language model, we use temperature sampling with the temperature parameter  $T = 1.2$ . To search for the proof of a theorem, we use the best-first search strategy described in [Polu and Sutskever, 2020]. The queue is ordered by the accumulated log likelihoods of the generated proof steps, with a maximum length of 32. Each proof step has a timeout limit

Table 1: Proof success rates on *PISA/test*

| Method                             | Success rate (%) |
|------------------------------------|------------------|
| LISA [Jiang et al., 2021]          | 33.2             |
| Sledgehammer                       | 25.7             |
| Language model                     | 39.0             |
| Language model $\cup$ Sledgehammer | 48.8             |
| Thor                               | <b>57.0</b>      |

of 10s. The search is terminated if and only if one of the following scenarios happens: (1) a valid proof has been found for the theorem; (2) the language model is queried 300 times; (3) a wallclock timeout of 500s has been reached; (4) the queue is empty but the theorem is not proved. Empirically, it takes  $\approx 60$  TPU hours to evaluate 1,000 problems.

Our language model setup is different from Language models of Isabelle proofs [Jiang et al., 2021, LISA] in three aspects: (1) our language model has 700M instead of 163M non-embedding parameters (2) the most recent proof step is included in the language model prompt (3) a higher sampling temperature (1.2 instead of 1.0) is used.

## 4.2 Datasets and Environment

We use two datasets. The first is the PISA dataset [Jiang et al., 2021], which includes the Isabelle/HOL repository<sup>3</sup> under a BSD-style license and the Archive of Formal Proofs version 2021-10-22<sup>4</sup>, whose various entries are under open-source licenses as described on its official page. PISA contains the core higher-order logic library of Isabelle, as well as a diverse library of proofs formalised with Isabelle, mostly concerning mathematics or verification of software and hardware. The PISA dataset contains 2.49 million datapoints in total. The proof states have an average length of 369 characters and the proof steps have an average length of 33 characters. All of the Isabelle/HOL theorems go into the training set as they are considered foundational and might be used by all other repositories. We make a 95%/1%/4% split of theorems from the AFP for the training/validation/test sets. We randomly select 3,000 theorems from the test set (*PISA/test*) for the evaluation of model performance.

The second is the Isabelle fraction of the MiniF2F dataset [Zheng et al., 2022] under an Apache license. The dataset contains 488 high school mathematics competition problems split into a validation set and a test set, each with 244 problems. These problems have been formalised in Lean, Metamath, and Isabelle to provide a benchmark of the same problems in different ITP languages. This allows us to contrast different approaches developed for different ITPs. Since we do not use the validation set for model selection, we do not actually distinguish between the two sets. Hence, we mainly compare with previous work on the test set as the final result.

We use the codebase by Jiang et al. [2021], under a BSD 3-clause license, to interact with the Isabelle server and prove theorems from both datasets.

## 4.3 Thor Against an Ensemble of a Language Model and Sledgehammer

Because Thor has both a language model and Sledgehammer at its disposal, we wish to investigate how it fares against a simple ensemble of the two. We set out to evaluate the performance of Thor, as well as a language model of the same configuration, and Sledgehammer with a 120s timeout on *PISA/test*. It takes  $\approx 50$  TPU hours to evaluate Thor for 1000 problems. The proof success rates on *PISA/test* are presented in the second column of Table 1. We can see that the language model alone and Sledgehammer alone can prove 39.0% and 25.7% of the problems respectively. When we take the union of the problems they manage to solve individually, we get a 48.8% success rate. Thor manages to prove 57.0% of the problems. This implies that for 8.2% of the problems, Thor uses both the language model and Sledgehammer to complete the proofs, and it’s not possible to achieve this

<sup>3</sup><https://isabelle.in.tum.de/website-Isabelle2021/dist/library/HOL/index.html>

<sup>4</sup><https://www.isa-afp.org/release/afp-2021-10-22.tar.gz>

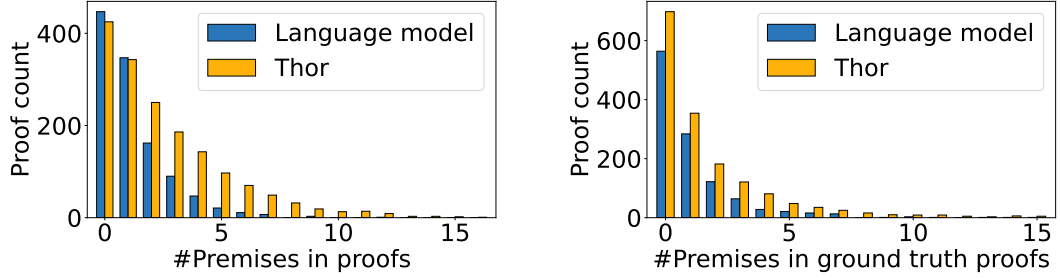

(a) The number of premises in successful proofs found by the language model and Thor.

(b) The number of premises in ground truth proofs for problems solved by the language model and Thor.

Figure 2: Comparison of the number of premises in problems the language model and Thor can solve.

Table 2: Proof success rates on *PISA/test*

| Variants of Thor                       | Success rate (%) |
|----------------------------------------|------------------|
| Base, sampling temperature $T = 1.2$   | 57.0             |
| Learning <i>how</i> to select premises | 55.4             |
| No proof context                       | 53.6             |
| Sampling temperature $T = 1.0$         | 55.7             |

with only the language model or only Sledgehammer. We perform 4 case studies on problems that only Thor can solve in Appendix A.

Thor’s motivation is to solve the premise selection problem for language models. To confirm that Thor helps premise selection, we collect the proofs generated by the language model and Thor respectively and count the number of premises in them. The results are presented in Figure 2a: we can see that for proofs requiring 0 or 1 premises, Thor and the language model perform similarly. But for proofs requiring more premises, Thor performs much more robustly, finding several times more proofs than the language model. We also count the number of premises in the ground truth proofs (written by humans) for theorems the language model and Thor can prove. The results are presented in Figure 2b: we see that whatever the number of premises the ground truth uses, Thor outperforms the language model in finding proofs, and the more premises the ground truth proof has, the more obvious is the effect. We conclude that Thor is indeed more capable of premise selection than language models.

#### 4.4 The Effect of Learning How to Select Premises

The procedure we described in Section 3 ensures that the language model learns *when* to do premise selection, but not *how* to do it, by replacing the premise selection steps with `<hammer>`. Here we investigate the effect of making the language model learn both *when* and *how*. An easy way to achieve this is to create a variant of Thor: (i) at training time, use the original data; (ii) at evaluation time, when the language model outputs a sequence containing any of the Sledgehammer keywords, invoke Sledgehammer. This further simplifies data preparation and explicitly subjects the language model to perform premise selection. To investigate the effect of this alternative approach, we evaluate a system trained in this way on *PISA/test* and present its success rate in Table 2. We can see that it achieves a success rate of 55.4% on *PISA/test*, 1.6% lower than the base version of Thor, which suggests that explicitly learning *how* to do premise selection marginally decreases its success rate. This result is expected: since finding *how* to do premise selection is entrusted to the hammer method, the language model should focus on learning *when* to invoke the hammer for optimal performance. Making the language model learn an irrelevant additional task only hurts Thor’s performance.

#### 4.5 The Effect of the Proof Context

Our language model setup differs from that of LISA [Jiang et al., 2021] in that we use the most recent proof step as the context in the input data, as introduced in Section 3. This is based on the intuition that the most recent proof step information is beneficial for the language model’s

Table 3: Proof success rates on *MiniF2F*.

| Method                               | Valid (%)   | Test (%)    |
|--------------------------------------|-------------|-------------|
| PACT [Han et al., 2021]              | 23.9        | 24.6        |
| Expert iteration [Polu et al., 2022] | <b>33.6</b> | 29.6        |
| Sledgehammer                         | 9.9         | 10.4        |
| Language model                       | 25.0        | 24.2        |
| Language model $\cup$ Sledgehammer   | 27.1        | 27.5        |
| Thor                                 | 28.3        | <b>29.9</b> |

reasoning ability. In this subsection we perform an ablation study to confirm the effect of this context on Thor. Here a variant of Thor is trained without the context information and evaluated on *PISA/test*. The results are in Table 2. We observe that this variant manages to prove 53.6% of theorems on *PISA/test*, 3.4% fewer than the base version of Thor. The drop in success rate indicates that the context information we use is crucial for the optimal performance of Thor.

#### 4.6 The Effect of the Sequence Sampling Diversity

Our language model setup differs from LISA [Jiang et al., 2021] also in the sampling temperature. Previous works on language models for theorem proving often use a temperature  $T = 1.0$  [Polu and Sutskever, 2020, Jiang et al., 2021] for sampling output sequences, while we use  $T = 1.2$ . A higher temperature in the sampling procedure means that the generated sequences are more diverse (having a higher entropy). Here we perform an ablation study on the diversity of Thor-generated sequences. We evaluate Thor with sampling temperature  $T = 1.0$  on *PISA/test* and the success rate is in Table 2. We can see that the success rate with sampling temperature  $T = 1.0$  is 55.7%, 1.3% lower than with  $T = 1.2$ . This suggests a more diverse sampling strategy can improve Thor’s performance, and that the optimal diversity in language model samples varies for different systems.

#### 4.7 Comparing Thor with Expert Iteration

There exist other methods for improving language models for theorem proving like value function training [Polu and Sutskever, 2020], proof artifact co-training [Han et al., 2021, PACT], and expert iteration [Polu et al., 2022]. We wish to compare Thor with them. However, these methods operate in ITPs other than Isabelle and are thus hard to compare with directly. Thankfully, Polu et al. [2022] used expert iteration [Silver et al., 2017] to improve PACT [Han et al., 2021] and to achieve the state-of-the-art result on MiniF2F, a dataset containing multiple ITP formalisations of the same problems. Hence, we can fairly contrast expert iteration with Thor. We should emphasise that Thor and expert iteration are not incompatible methods: one can use Thor *together with* expert iteration.

We start by evaluating Thor, a language model with the same configuration, and Sledgehammer on MiniF2F. The results are presented in Table 3. We also include the success rates of the language model that Polu et al. [2022] used (PACT), as well as the language model after expert iteration in the same table. The success rates on the validation set are also included, but we use the rates on the test set as the final results, as the valid set can be used for model selection. We can see that the language model is able to prove 24.2% of the problems on MiniF2F, similar to PACT’s 24.6%. Thor increases the success rate of the language model by 5.7% to 29.9%, while expert iteration increases the success rate of PACT by 5.0% to 29.6%. Hence, the improvement in proof success rate brought upon the language model by Thor is comparable to that by expert iteration.

An important factor in choosing a suitable method is its cost. Expert iteration requires manually creating a set of “curriculum” problems, evaluating the language model on them, and training the language model on a growing training set for one epoch every iteration. We estimate that to perform expert iteration at the same scale as Polu et al. [2022] for Isabelle, it would cost 100 human hours to formalise 300 maths problems, and 500 TPU hours to evaluate and fine-tune the language model for 8 expert iterations. Thor, on the other hand, incurs little extra computational cost compared with training a standard language model. We conclude that while requiring a much smaller computational budget, Thor can improve language models’ success rates to a similar degree as expert iteration.



## 5 Related Work

Language models were first applied to automate theorem proving by Polu and Sutskever [2020]. Since then, there have been a few works [Han et al., 2021, Jiang et al., 2021, Polu et al., 2022] aiming to enhance the ability of language-model-based reasoning systems, or to enable these systems for interactive theorem provers that were not supported before. All of these works used the same framework laid down by Polu and Sutskever [2020], namely to iteratively sample from a language model and directly apply the output to the ITP. Thor, to the best of our knowledge, is the first system to explicitly hybridise language models and symbolic reasoning tools (ATPs) for theorem proving. Instead of relying on language models entirely, Thor uses hammers, a well-established tool, to solve premise selection.

With the growing bodies of formal mathematical libraries, premise selection has become one of the most crucial tasks of theorem proving. The hammer method is one of the many ways that premise selection can be done. We have described how the Isabelle implementation of the hammer method selects premises in Section 2. HOL(y)Hammer [Kaliszyk and Urban, 2015] and CoqHammer [Czajka and Kaliszyk, 2018] implement the hammer method for HOL Light and Coq respectively, making it possible for Thor to be instantiated for them. Apart from hammers, SInE [Hoder and Voronkov, 2011] and SRASS [Sutcliffe and Puzis, 2007] are both symbolic methods that take on the task of premise selection by ranking the available premises according to their relevance to the current conjecture, measured by syntactic and semantic distances respectively. MaLAREa [Urban, 2007] pioneered having machine learning components in premise selection systems and its later version MaLAREa SG1 [Urban et al., 2008] combines machine learning and formal semantics for premise selection. A few approaches [Irving et al., 2016, Wang et al., 2017, Kaliszyk et al., 2017] use deep learning in the premise selection task. All these diverse methods may have quantitative or qualitative merits over the hammer approach, and thus have the potential to be integrated as the premise selection component for future versions of Thor.

## 6 Discussion

In this paper we introduced a simple approach to overcome language models’ weakness in premise selection for theorem proving: we created Thor, a framework that integrates language models and automated theorem provers via the hammer proof method. We presented a straightforward protocol for deploying Thor on any hammer-enabled ITP. The instance of Thor with Isabelle dramatically increased the number of automatically proved theorems, suggesting that language models’ deficiency at premise selection can be effectively compensated by utilising ATPs. Furthermore, approaches like expert iteration [Polu et al., 2022] or proof artifact co-training [Han et al., 2021] have no contradictions and can be easily incorporated with Thor. Compared with these methods, Thor has the additional advantage of being computationally efficient.

One limitation of Thor is that it only admits automated theorem provers that directly generate valid proof steps in the ITP via the use of the hammer. In Section 5, we pointed out that there are other premise selection tools with approaches different from the hammer method that the current version of Thor cannot use. Also, there exist methods which assist premise selection but do not directly generate the proof steps. An example of this is SErAPIS [Stathopoulos et al., 2020], which performs semantic search over the Isabelle mathematical library with the help of Wikipedia. Thor cannot use this class of methods either. We leave to future work the task of broadening the options for the premise selection tool that Thor uses. Here we only tested Thor on the ITP Isabelle due to the computational costs of experiments. Therefore another future direction is to instantiate Thor with other ITPs and see whether improvements brought by Thor are as significant for other ITPs as we show them here for Isabelle.

Thor demonstrates how a difficult problem for language models can be solved by borrowing tools from another research domain. We are encouraged by its success and think that more problems like premise selection can be identified and solved similarly. With its strong performance, computational efficiency, and convenient deployment, Thor gives scope to tool hybridisation, which shows promise to be impactful in the field of automated reasoning, and artificial intelligence in general.

## References

- Jeremy Avigad, Kevin Donnelly, David Gray, and Paul Raff. A formally verified proof of the prime number theorem. *ACM Transactions on Computational Logic (TOCL)*, 9(1):2–es, 2007.
- Jasmin Christian Blanchette, Cezary Kaliszyk, Lawrence C. Paulson, and Josef Urban. Hammering towards QED. *J. Formaliz. Reason.*, 9(1):101–148, 2016. doi: 10.6092/issn.1972-5787/4593. URL <https://doi.org/10.6092/issn.1972-5787/4593>.
- Stephen A Cook. The complexity of theorem-proving procedures. In *Proceedings of the third annual ACM symposium on Theory of computing*, pages 151–158, 1971.
- Lukasz Czajka and Cezary Kaliszyk. Hammer for coq: Automation for dependent type theory. *J. Autom. Reason.*, 61(1-4):423–453, 2018. doi: 10.1007/s10817-018-9458-4. URL <https://doi.org/10.1007/s10817-018-9458-4>.
- Martin Davis, George Logemann, and Donald Loveland. A machine program for theorem-proving. *Communications of the ACM*, 5(7):394–397, 1962.
- Leo Gao, Stella Biderman, Sid Black, Laurence Golding, Travis Hoppe, Charles Foster, Jason Phang, Horace He, Anish Thite, Noa Nabeshima, Shawn Presser, and Connor Leahy. The pile: An 800gb dataset of diverse text for language modeling, 2021. URL <https://arxiv.org/abs/2101.00027>.
- Thibault Gauthier and Cezary Kaliszyk. Premise selection and external provers for HOL4. In Xavier Leroy and Alwen Tiu, editors, *Proceedings of the 2015 Conference on Certified Programs and Proofs, CPP 2015, Mumbai, India, January 15-17, 2015*, pages 49–57. ACM, 2015. doi: 10.1145/2676724.2693173. URL <https://doi.org/10.1145/2676724.2693173>.
- Herbert L Gelernter. Realization of a geometry theorem proving machine. In *IFIP congress*, pages 273–281, 1959.
- Georges Gonthier, Andrea Asperti, Jeremy Avigad, Yves Bertot, Cyril Cohen, François Garillot, Stéphane Le Roux, Assia Mahboubi, Russell O’Connor, Sidi Ould Biha, et al. A machine-checked proof of the odd order theorem. In *International conference on interactive theorem proving*, pages 163–179. Springer, 2013.
- Georges Gonthier et al. Formal proof—the four-color theorem. *Notices of the AMS*, 55(11):1382–1393, 2008.
- Jesse Michael Han, Jason Rute, Yuhuai Wu, Edward W. Ayers, and Stanislas Polu. Proof artifact co-training for theorem proving with language models. *CoRR*, abs/2102.06203, 2021. URL <https://arxiv.org/abs/2102.06203>.
- Kryštof Hoder and Andrei Voronkov. Sine qua non for large theory reasoning. In *International Conference on Automated Deduction*, pages 299–314. Springer, 2011.
- Geoffrey Irving, Christian Szegedy, Alexander A Alemi, Niklas Eén, François Chollet, and Josef Urban. Deepmath-deep sequence models for premise selection. *Advances in neural information processing systems*, 29, 2016.
- Albert Q. Jiang, Wenda Li, Jesse Michael Han, and Yuhuai Wu. Lisa: Language models of isabelle proofs. *6th Conference on Artificial Intelligence and Theorem Proving*, 2021.
- Cezary Kaliszyk and Josef Urban. Hol(y)hammer: Online ATP service for HOL light. *Math. Comput. Sci.*, 9(1):5–22, 2015. doi: 10.1007/s11786-014-0182-0. URL <https://doi.org/10.1007/s11786-014-0182-0>.
- Cezary Kaliszyk, François Chollet, and Christian Szegedy. Holstep: A machine learning dataset for higher-order logic theorem proving. *arXiv preprint arXiv:1703.00426*, 2017.
- Gerwin Klein, Kevin Elphinstone, Gernot Heiser, June Andronick, David Cock, Philip Derrin, Dhammika Elkaduwe, Kai Engelhardt, Rafal Kolanski, Michael Norrish, et al. sel4: Formal verification of an os kernel. In *Proceedings of the ACM SIGOPS 22nd symposium on Operating systems principles*, pages 207–220, 2009.

- 408 Daniel Kühlwein, Twan van Laarhoven, Evgeni Tsivtsivadze, Josef Urban, and Tom Heskes. Overview  
409 and evaluation of premise selection techniques for large theory mathematics. In Bernhard Gramlich,  
410 Dale Miller, and Uli Sattler, editors, *Automated Reasoning - 6th International Joint Conference,  
411 IJCAR 2012, Manchester, UK, June 26-29, 2012. Proceedings*, volume 7364 of *Lecture Notes in  
412 Computer Science*, pages 378–392. Springer, 2012. doi: 10.1007/978-3-642-31365-3\_30. URL  
413 [https://doi.org/10.1007/978-3-642-31365-3\\_30](https://doi.org/10.1007/978-3-642-31365-3_30).
- 414 Wenda Li, Lei Yu, Yuhuai Wu, and Lawrence C. Paulson. Isarstep: a benchmark for high-level  
415 mathematical reasoning. In *9th International Conference on Learning Representations, ICLR 2021,  
416 Virtual Event, Austria, May 3-7, 2021*. OpenReview.net, 2021. URL [https://openreview.net/  
417 forum?id=Pzj6fzU6wkj](https://openreview.net/forum?id=Pzj6fzU6wkj).
- 418 Jia Meng and Lawrence C. Paulson. Translating higher-order clauses to first-order clauses. *J. Autom.  
419 Reason.*, 40(1):35–60, 2008. doi: 10.1007/s10817-007-9085-y. URL [https://doi.org/10.  
420 1007/s10817-007-9085-y](https://doi.org/10.1007/s10817-007-9085-y).
- 421 Olga Ohrimenko, Peter J Stuckey, and Michael Codish. Propagation via lazy clause generation.  
422 *Constraints*, 14(3):357–391, 2009.
- 423 Lawrence C. Paulson. Three years of experience with sledgehammer, a practical link between  
424 automatic and interactive theorem provers. In Renate A. Schmidt, Stephan Schulz, and Boris  
425 Konev, editors, *Proceedings of the 2nd Workshop on Practical Aspects of Automated Reasoning,  
426 PAAR-2010, Edinburgh, Scotland, UK, July 14, 2010*, volume 9 of *EPiC Series in Computing*,  
427 pages 1–10. EasyChair, 2010. doi: 10.29007/tnfd. URL <https://doi.org/10.29007/tnfd>.
- 428 Stanislas Polu and Ilya Sutskever. Generative language modeling for automated theorem proving.  
429 *CoRR*, abs/2009.03393, 2020. URL <https://arxiv.org/abs/2009.03393>.
- 430 Stanislas Polu, Jesse Michael Han, Kunhao Zheng, Mantas Baksys, Igor Babuschkin, and Ilya  
431 Sutskever. Formal mathematics statement curriculum learning. *CoRR*, abs/2202.01344, 2022.  
432 URL <https://arxiv.org/abs/2202.01344>.
- 433 Alec Radford, Jeffrey Wu, Rewon Child, David Luan, Dario Amodei, Ilya Sutskever, et al. Language  
434 models are unsupervised multitask learners. *OpenAI blog*, 1(8):9, 2019.
- 435 Peter Scholze. Liquid tensor experiment. *Experimental Mathematics*, 0(0):1–6, 2021. doi: 10.1080/  
436 10586458.2021.1926016. URL <https://doi.org/10.1080/10586458.2021.1926016>.
- 437 David Silver, Thomas Hubert, Julian Schrittwieser, Ioannis Antonoglou, Matthew Lai, Arthur  
438 Guez, Marc Lanctot, Laurent Sifre, Dhharshan Kumaran, Thore Graepel, Timothy P. Lillicrap,  
439 Karen Simonyan, and Demis Hassabis. Mastering chess and shogi by self-play with a general  
440 reinforcement learning algorithm. *CoRR*, abs/1712.01815, 2017. URL [http://arxiv.org/abs/  
441 1712.01815](http://arxiv.org/abs/1712.01815).
- 442 Yiannos Stathopoulos, Angeliki Koutsoukou-Argyraki, and LC Paulson. Serapis: A concept-oriented  
443 search engine for the isabelle libraries based on natural language. In *Online proceedings of the  
444 Isabelle Workshop*, 2020.
- 445 Jianlin Su, Yu Lu, Shengfeng Pan, Bo Wen, and Yunfeng Liu. Roformer: Enhanced transformer with  
446 rotary position embedding, 2021. URL <https://arxiv.org/abs/2104.09864>.
- 447 Geoff Sutcliffe and Yury Puzis. SRASS - A semantic relevance axiom selection system. In Frank  
448 Pfenning, editor, *Automated Deduction - CADE-21, 21st International Conference on Automated  
449 Deduction, Bremen, Germany, July 17-20, 2007, Proceedings*, volume 4603 of *Lecture Notes in  
450 Computer Science*, pages 295–310. Springer, 2007. doi: 10.1007/978-3-540-73595-3\_20. URL  
451 [https://doi.org/10.1007/978-3-540-73595-3\\_20](https://doi.org/10.1007/978-3-540-73595-3_20).
- 452 Geoff Sutcliffe, Josef Urban, and Stephan Schulz, editors. *Proceedings of the CADE-21 Workshop  
453 on Empirically Successful Automated Reasoning in Large Theories, Bremen, Germany, 17th  
454 July 2007*, volume 257 of *CEUR Workshop Proceedings*, 2007. CEUR-WS.org. URL [http:  
455 //ceur-ws.org/Vol-257](http://ceur-ws.org/Vol-257).
- 456 Alfred Tarski. Truth and proof. *Scientific American*, 220(6):63–77, 1969.

- 457 Josef Urban. Malarea: a metasytem for automated reasoning in large theories. In *ESARLT*, 2007.
- 458 Josef Urban, Geoff Sutcliffe, Petr Pudlák, and Jirí Vyskocil. Malarea SG1- machine learner for  
 459 automated reasoning with semantic guidance. In Alessandro Armando, Peter Baumgartner, and  
 460 Gilles Dowek, editors, *Automated Reasoning, 4th International Joint Conference, IJCAR 2008,*  
 461 *Sydney, Australia, August 12-15, 2008, Proceedings*, volume 5195 of *Lecture Notes in Computer*  
 462 *Science*, pages 441–456. Springer, 2008. doi: 10.1007/978-3-540-71070-7\_37. URL [https://doi.org/10.1007/978-3-540-71070-7\\_37](https://doi.org/10.1007/978-3-540-71070-7_37).
- 464 Ashish Vaswani, Noam Shazeer, Niki Parmar, Jakob Uszkoreit, Llion Jones, Aidan N. Gomez, Lukasz  
 465 Kaiser, and Illia Polosukhin. Attention is all you need, 2017. URL [https://arxiv.org/abs/](https://arxiv.org/abs/1706.03762)  
 466 1706.03762.
- 467 Ben Wang and Aran Komatsuzaki. GPT-J-6B: A 6 Billion Parameter Autoregressive Language Model.  
 468 <https://github.com/kingoflolz/mesh-transformer-jax>, May 2021.
- 469 Mingzhe Wang, Yihe Tang, Jian Wang, and Jia Deng. Premise selection for theorem proving by deep  
 470 graph embedding. *Advances in neural information processing systems*, 30, 2017.
- 471 Kunhao Zheng, Jesse Michael Han, and Stanislas Polu. minif2f: a cross-system benchmark for  
 472 formal olympiad-level mathematics. In *International Conference on Learning Representations*,  
 473 2022. URL <https://openreview.net/forum?id=9ZPegFuFTFv>.

## 474 Checklist

- 475 1. For all authors...
- 476 (a) Do the main claims made in the abstract and introduction accurately reflect the paper’s  
 477 contributions and scope? [Yes] We have clearly listed the contributions of the paper at  
 478 the end of Section 1. These claims are justified in Sections 3 and 4.
- 479 (b) Did you describe the limitations of your work? [Yes] We described the limitations  
 480 of our work in the second paragraph of Section 6. The limitations on the form of the  
 481 premise selection tool and the uncertainty of full generalisation to other ITPs due to  
 482 computational budget constraint were discussed.
- 483 (c) Did you discuss any potential negative societal impacts of your work? [Yes] As this  
 484 is a paper focusing on formal theorem proving, every mathematical result has been  
 485 checked by an interactive theorem prover and is unlikely to mislead the theorem proving  
 486 community. Hence, we see no direct negative societal impacts of this work. But we did  
 487 discuss the cost of training and evaluating language models in Section 4.
- 488 (d) Have you read the ethics review guidelines and ensured that your paper conforms to  
 489 them? [Yes] I have.
- 490 2. If you are including theoretical results...
- 491 (a) Did you state the full set of assumptions of all theoretical results? [N/A]
- 492 (b) Did you include complete proofs of all theoretical results? [N/A]
- 493 3. If you ran experiments...
- 494 (a) Did you include the code, data, and instructions needed to reproduce the main ex-  
 495 perimental results (either in the supplemental material or as a URL)? [Yes] We have  
 496 included the urls to the implementations of language models we used, as well as the  
 497 code for generating data and interacting with Isabelle.
- 498 (b) Did you specify all the training details (e.g., data splits, hyperparameters, how they  
 499 were chosen)? [Yes] Yes. We specified the training details in subsection 4.1.
- 500 (c) Did you report error bars (e.g., with respect to the random seed after running ex-  
 501 periments multiple times)? [No] We did not include error bars because running the  
 502 experiments is very computationally expensive. To evaluate a model for the full set of  
 503 test problems requires  $\approx 180$  TPU hours, empirically. Attaining error bars by repeating  
 504 the experiments is prohibitively expensive for us.
- 505 (d) Did you include the total amount of compute and the type of resources used (e.g., type  
 506 of GPUs, internal cluster, or cloud provider)? [Yes] We included the details of our  
 507 hardware setup, as well as the total estimated amount of compute in subsection 4.1.

- 508 4. If you are using existing assets (e.g., code, data, models) or curating/releasing new assets...
- 509 (a) If your work uses existing assets, did you cite the creators? [Yes] We cited the creators
- 510 of the assets when we first mentioned them, extensively in subsections 4.1 and 4.2.
- 511 (b) Did you mention the license of the assets? [Yes] We mentioned the licenses of the
- 512 assets we used in the paper when we first mentioned them.
- 513 (c) Did you include any new assets either in the supplemental material or as a URL? [Yes]
- 514 We include the code we used to evaluate the models in the supplemental material. The
- 515 data we used are all under open-source licenses.
- 516 (d) Did you discuss whether and how consent was obtained from people whose data you're
- 517 using/curating? [Yes] The assets we used mostly have open-sourced licenses. We
- 518 mentioned that we had consent to adapt the proof from Li et al. [2021] in Section 2.
- 519 (e) Did you discuss whether the data you are using/curating contains personally identifiable
- 520 information or offensive content? [No] The data we used are mathematical proofs so
- 521 we think it is apparent that they do not contain personally identifiable information or
- 522 any offensive content.
- 523 5. If you used crowdsourcing or conducted research with human subjects...
- 524 (a) Did you include the full text of instructions given to participants and screenshots, if
- 525 applicable? [N/A] We did not use crowdsourcing or conduct research with human
- 526 subjects.
- 527 (b) Did you describe any potential participant risks, with links to Institutional Review
- 528 Board (IRB) approvals, if applicable? [N/A] We did not use crowdsourcing or conduct
- 529 research with human subjects.
- 530 (c) Did you include the estimated hourly wage paid to participants and the total amount
- 531 spent on participant compensation? [N/A] We did not use crowdsourcing or conduct
- 532 research with human subjects.

## 533 A Appendix

534 In this section, we present some lemmas solved by Thor only.

535 **Case 1.** The lemma `cols_upt_k_insert` is from the *QR Decomposition* entry<sup>5</sup> in the AFP.

```

lemma cols_upt_k_insert:
  fixes A::"'a'^'n'::{mod_type}~'m'::{mod_type}"
  assumes k: "(Suc k) < ncols A"
  shows "cols_upt_k A (Suc k) = (insert (column
    (from_nat (Suc k)) A) (cols_upt_k A k))"
  unfolding cols_upt_k_def
  apply (auto)
  apply (metis Suc_lessD from_nat_mono' from_nat_to_nat_id k
    less_Suc_eq_le less_le ncols_def to_nat_le)
  by (metis from_nat_mono' k less_imp_triv
    less_or_eq_imp_le ncols_def not_less_eq order_trans)

```

536 Here, `cols_upt_k A (Suc k)` returns the set of columns in the matrix  $A$  up to the natural number  
 537  $k+1$ , while `ncols A` counts the number of columns in the matrix  $A$ . In short, this lemma claims that  
 538 the set of columns (in a matrix  $A$ ) up to column index  $k+1$  is equivalent to that of the same matrix  
 539 up to column index  $k$  inserted with the  $(k+1)^{\text{th}}$  column (of  $A$ ). This will subject to the condition  
 540 that  $k+1$  is less than the number of columns in  $A$ . With Thor, the LM decided to unfold the goal  
 541 with the definition of `cols_upt_k`, which is followed by an `auto` tactic to simplify the proof state. All  
 542 remaining subgoals are then discharged by Sledgehammer.

543 **Case 2.** The lemma `size_del_max` is from the *Weight-Balanced Trees* entry<sup>6</sup> in the AFP.

```

lemma size_del_max: "t ≠ Leaf ⇒ size t = Suc(size(snd(del_max t)))"
  apply (induction t rule: del_max.induct)
  apply simp
  apply (clarsimp split: prod.splits)
  apply (smt (z3) size_rotateR size_wbt.simps(1))
  by simp

```

544 In this lemma,  $t$  is a weight-balanced tree, and the `size` function measures its size (as the name  
 545 suggests) and `del_max` deletes the maximum node from it. Essentially, this lemma claims that when a  
 546 weight-balanced its size will be reduced by one if we remove the largest node from it. For the proof,  
 547 Thor intelligently performs structural induction with the induction rule `del_max.induct` and then  
 548 simplifies the proof state a few times, which includes splitting products with the rule `prod.splits`.  
 549 Finally, Thor concludes the remaining goals with Sledgehammer.

550 **Case 3.** The lemma `t_list_of_B_log_bound` is from the AFP entry named as *Priority Queues Based*  
 551 *on Braun Trees*.<sup>7</sup>

```

lemma t_list_of_B_log_bound:
  "braun t ⇒ t_list_of_B t ≤ 3 * (nlog2 (size t + 1) + 1) * size t"
  apply (induction t rule: measure_induct_rule[where f=size])
  apply (case_tac x)
  apply simp
  using braun.simps(1) t_list_of_B_braun_simps(1) apply blast
  by (metis acomplete_if_braun height_acomplete order_refl
    size1_size t_list_of_B_induct)

```

552 Here, `size` measures the size of a Braun tree; `nlog2` stands for the function  $\lambda x. \lceil \log_2(x) \rceil$ ;  
 553 `t_list_of_B` is another measure of a Braun tree. Basically, this lemma describes the relation-  
 554 ship between a normal tree size and a Braun-tree specific measure. The proof starts with an intelligent  
 555 structural induction, progresses with case analysis, and is concluded with Sledgehammer on each of  
 556 the remaining subgoals.

<sup>5</sup>QR\_Decomposition/Gram\_Schmidt.thy

<sup>6</sup>Weight\_Balanced\_Trees/Weight\_Balanced\_Trees.thy

<sup>7</sup>Priority\_Queue\_Braun/Sorting\_Braun.thy

557 **Case 4.** The lemma `inj_imp_Ker0` is from the AFP entry named as *Matrices, Jordan Normal Forms,*  
558 *and Spectral Radius Theory*.<sup>8</sup>

```
lemma inj_imp_Ker0:
  assumes "inj_on T (carrier V)"
  shows "carrier (V.vs kerT) = {0_V}"
  apply (rule equalityI)
  apply (rule subsetI)
  apply (unfold ker_def, auto)
  by (metis V.module.M.zero_closed assms f0_is_0 inj_on_contraD)
```

559 Here,  $T$  is a linear map between two vector spaces. The lemma claims that if the  $T$  is injective on the  
560 carrier set of the space  $V$ , the kernel of  $T$  has to be a singleton set with the zero in  $V$ . In this proof,  
561 Thor naturally performs a sequence of introduction steps by applying the lemma `equalityI` and  
562 `subsetI`, before unfolds the definition of a kernel (i.e., `ker_def`) and uses `auto` to simplify the proof  
563 state. The final remaining goal is closed with `Sledgehammer`.

---

<sup>8</sup>Jordan\_Normal\_Form/Missing\_VectorSpace.thy
